# Supplementary material
Source: PubMed Central journal article supplement (PMC2681006)
Supplement: mmc1.pdf [file mmc1.pdf]

Supplemental Data

**The Mitochondrial Disulfide Relay System Protein GFER**

**Is Mutated in Autosomal-Recessive Myopathy**

**with Cataract and Combined Respiratory-Chain Deficiency**

Alessio Di Fonzo, Dario Ronchi, Tiziana Lodi, Elisa Fassone, Marco Tigano, Costanza Lamperti, Stefania Corti, Andreina Bordoni, Francesco Fortunato, Monica Nizzardo, Laura Napoli, Chiara Donadoni, Sabrina Salani, Francesca Saladino, Maurizio Moggio, Nereo Bresolin, Iliana Ferrero, and Giacomo P. Comi

**Figure S1. Pedigree Diagram of the Genotyped Family**

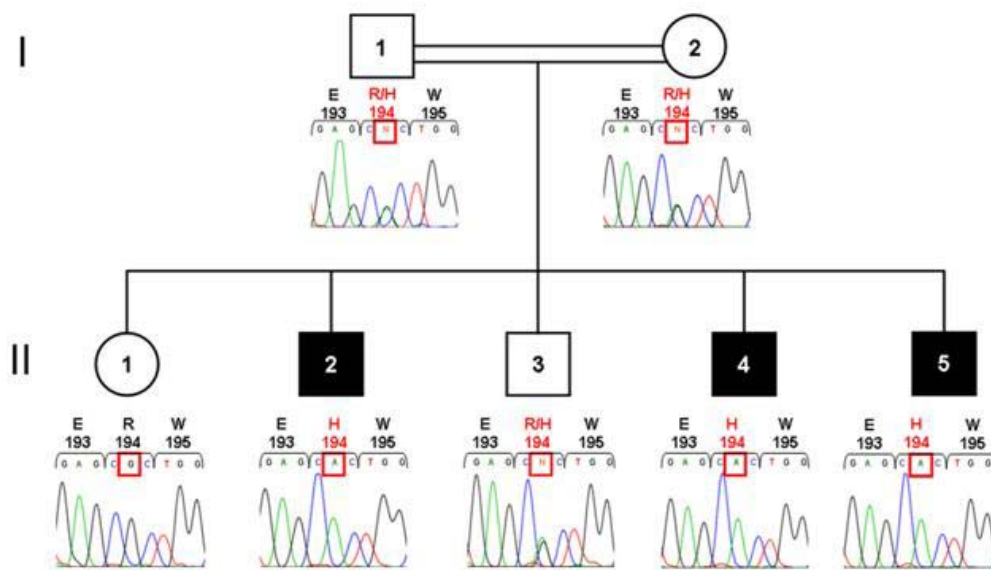

Black symbols denote affected individuals, open symbols denote unaffected individuals. Electropherograms of the genomic DNA sequence of *GFER* show the segregation of c.581 G>A and predicted amino acid substitutions (in red).

Figure S2. Yeast Ultrastructural Analysis

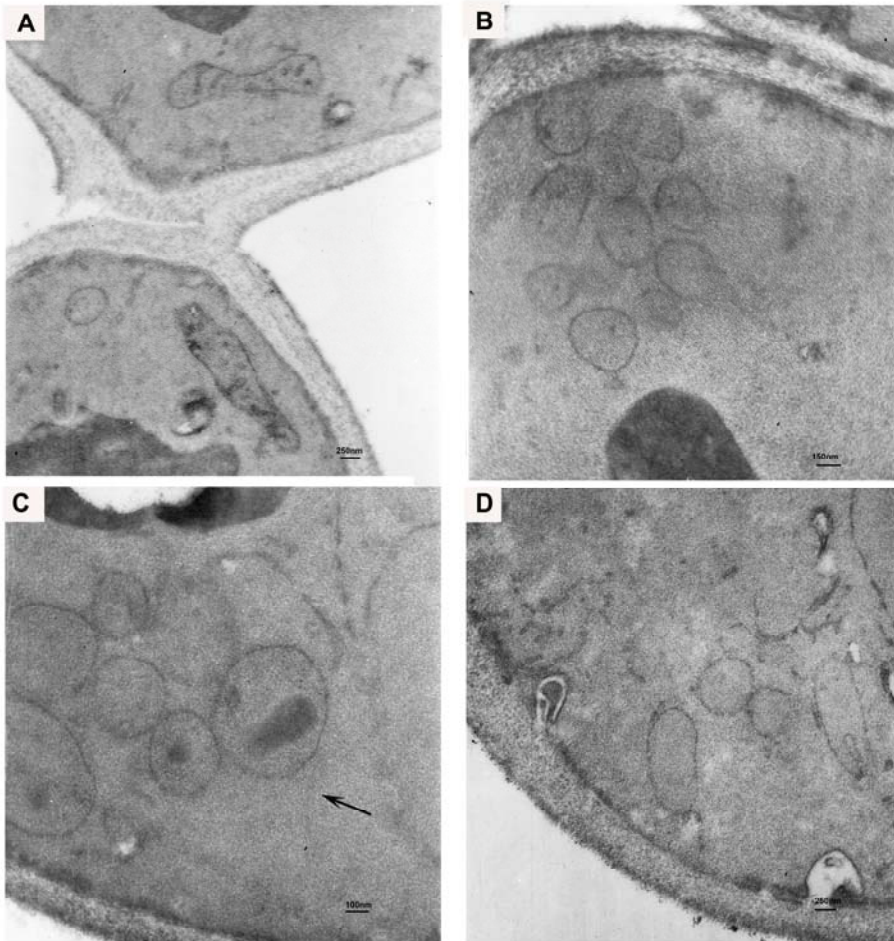

(A) Wild-type yeast showing normal mitochondria with normal cristae. (B-C) Yeast carrying the *erv1R182H* allele after an 8-hour shift to 37°C. Note the clusters of swollen mitochondria with no cristae, showing both small and large electron dense inclusions (arrow). (D) Mitochondria with no cristae and thin membranes in mutated yeast at 16 h.

**Table S1. Oligonucleotides Used for the PCR Amplification of *GFER* and the Sequence Analysis of Genomic DNA and cDNA**

---

|             |                        |
|-------------|------------------------|
| GFER_1aF    | TGGCTCCGCCTCCACACG     |
| GFER_1aR    | TCCACGTCTTGAAGTCGACG   |
| GFER_1bF    | TGACCCGGCAGGCCTTGC     |
| GFER_1bR    | AGGTTCAGGGACAGGCAACC   |
| GFER_2F     | GATCGTCTGCAGGACTTTGG   |
| GFER_2R     | CATCCGTTTCTCTACGTTCC   |
| GFER_3F     | GGTGTAGTTCACAGCAGTGC   |
| GFER_3R     | TGAGACACAACAGGCTCTGG   |
| cDNA_1F     | CCTTGCGCGGGCAACATG     |
| cDNA_3R     | CTAGTCACAGGAGCCATCCTTC |
| cDNA_1RX>L* | CAAGTCACAGGAGCCATCCTTC |

---

\* This primer was used in the creation of the GFER-GFP fusion protein.
